# Supplementary material
Source: PubMed Central journal article supplement (PMC2505196)
Supplement: NIHMS58571-supplement-1.pdf [file NIHMS58571-supplement-1.pdf]

## Supporting Information

### Conjugated Platinum(IV)-Peptide Complexes for Targeting Angiogenic Tumor Vasculature

Sumitra Mukhopadhyay,<sup>†,¶</sup> Carmen M. Barnés,<sup>‡,¶,\*</sup> Ariel Haskel,<sup>†</sup> Sarah M. Short,<sup>‡</sup> Katie R. Barnes,<sup>†</sup> and Stephen J. Lippard<sup>†,\*</sup>

Department of Chemistry, Massachusetts Institute of Technology, Cambridge, Massachusetts 02139, and Vascular Biology Program, Children's Hospital and Harvard Medical School, Boston, Massachusetts 02115

<sup>¶</sup>These authors contributed equally to the work

\*To whom correspondence should be addressed.

Email: [carmen.barnes@childrens.harvard.edu](mailto:carmen.barnes@childrens.harvard.edu), [lippard@mit.edu](mailto:lippard@mit.edu)

<sup>†</sup> Massachusetts Institute of Technology

<sup>‡</sup> Harvard Medical School

Running title: Pt(IV)-Peptide Complexes for Angiogenic Targeting

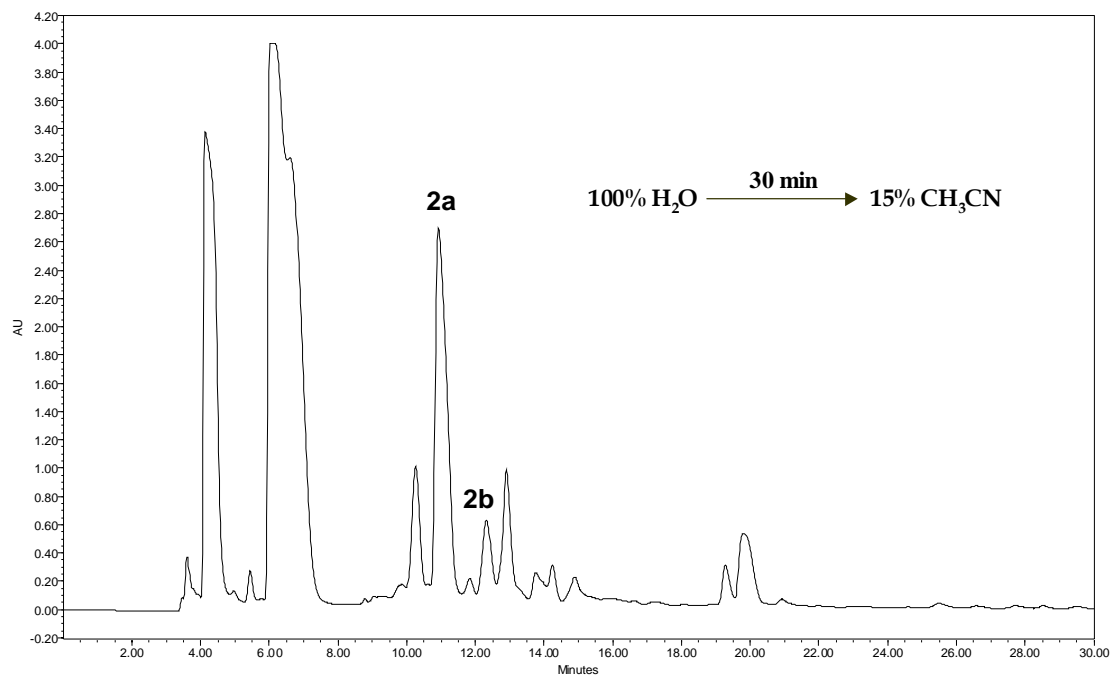

**Figure S1.** Reverse-phase HPLC purification of Pt(IV)-RGD conjugates, **2a** and **2b** (C18 semi-preparatory column, 40 mm x 250 mm, linear gradient from 100% H<sub>2</sub>O to 15% acetonitrile over 30 min).

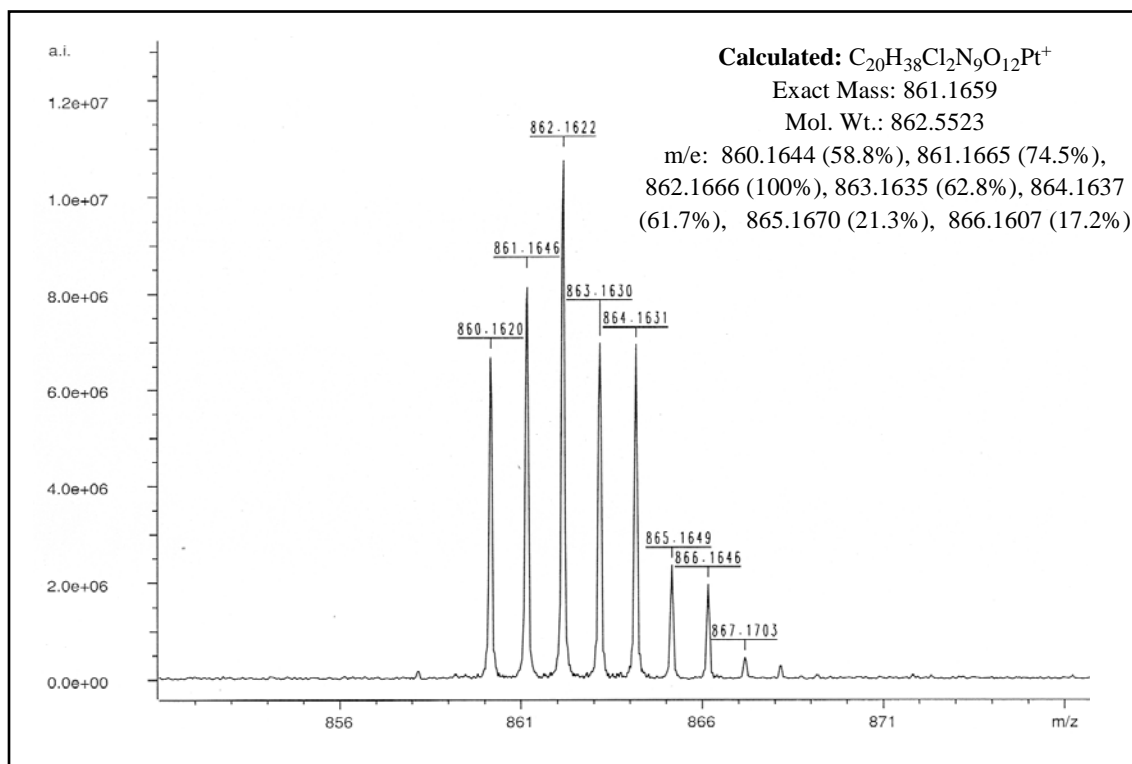

**Figure S2a.** ESI-MS of monoconjugated Pt-RGD complex, **2a** (the  $[M+H]^+$  peak).

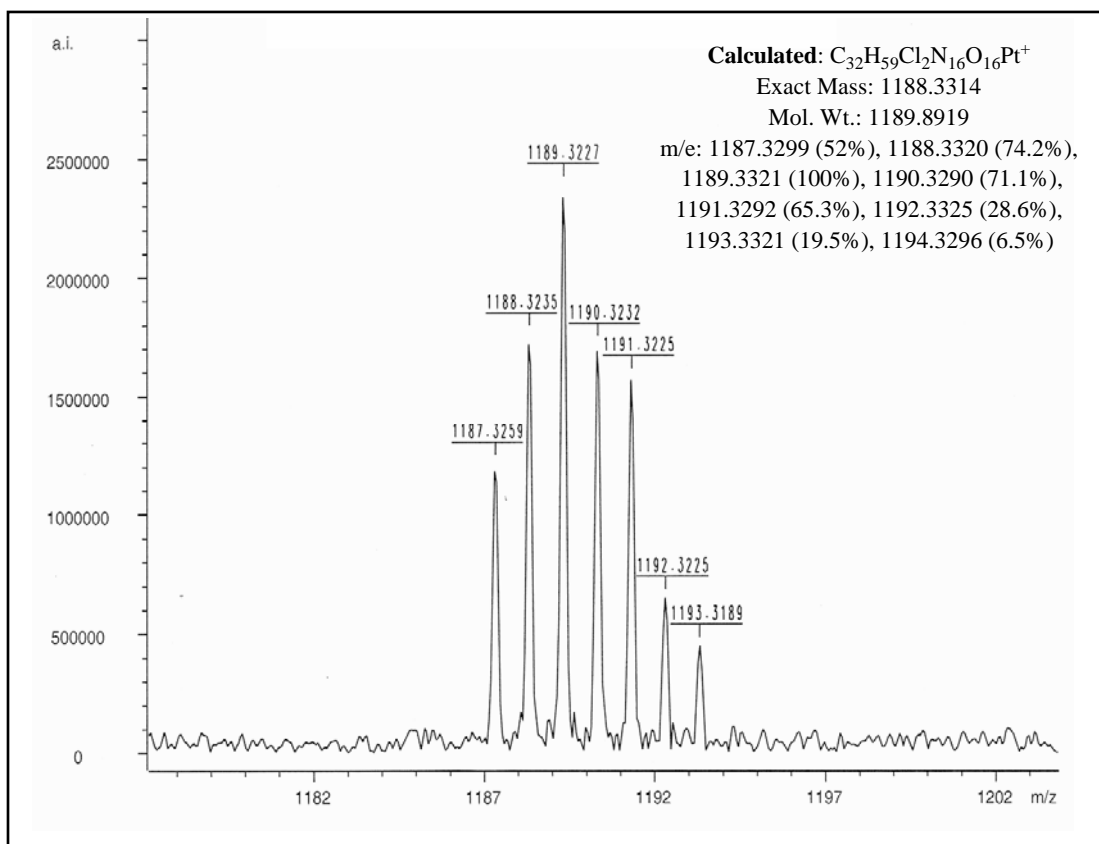

**Figure S2b.** ESI-MS of the diconjugated Pt-RGD complex, **2b** (the  $[M+H]^+$  peak).

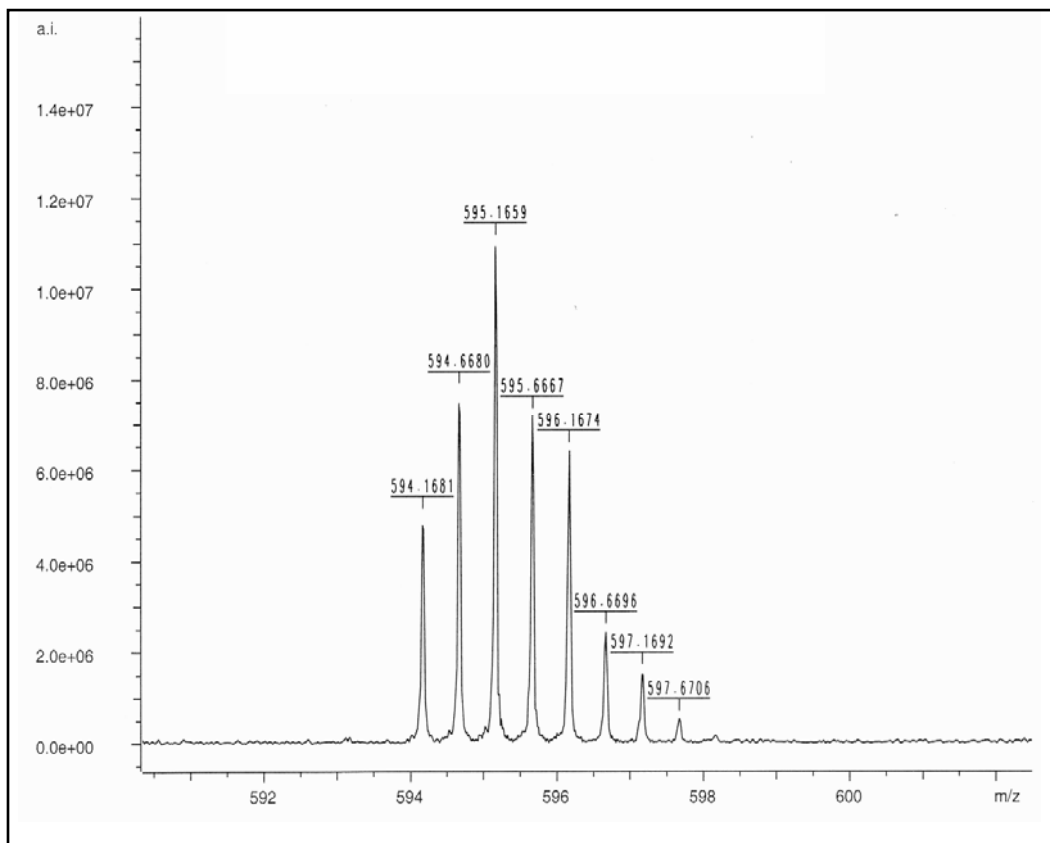

**Figure S2c.** ESI-MS of diconjugated Pt-RGD complex, **2b** (the  $[M + 2H]^{2+}/2$  peak).

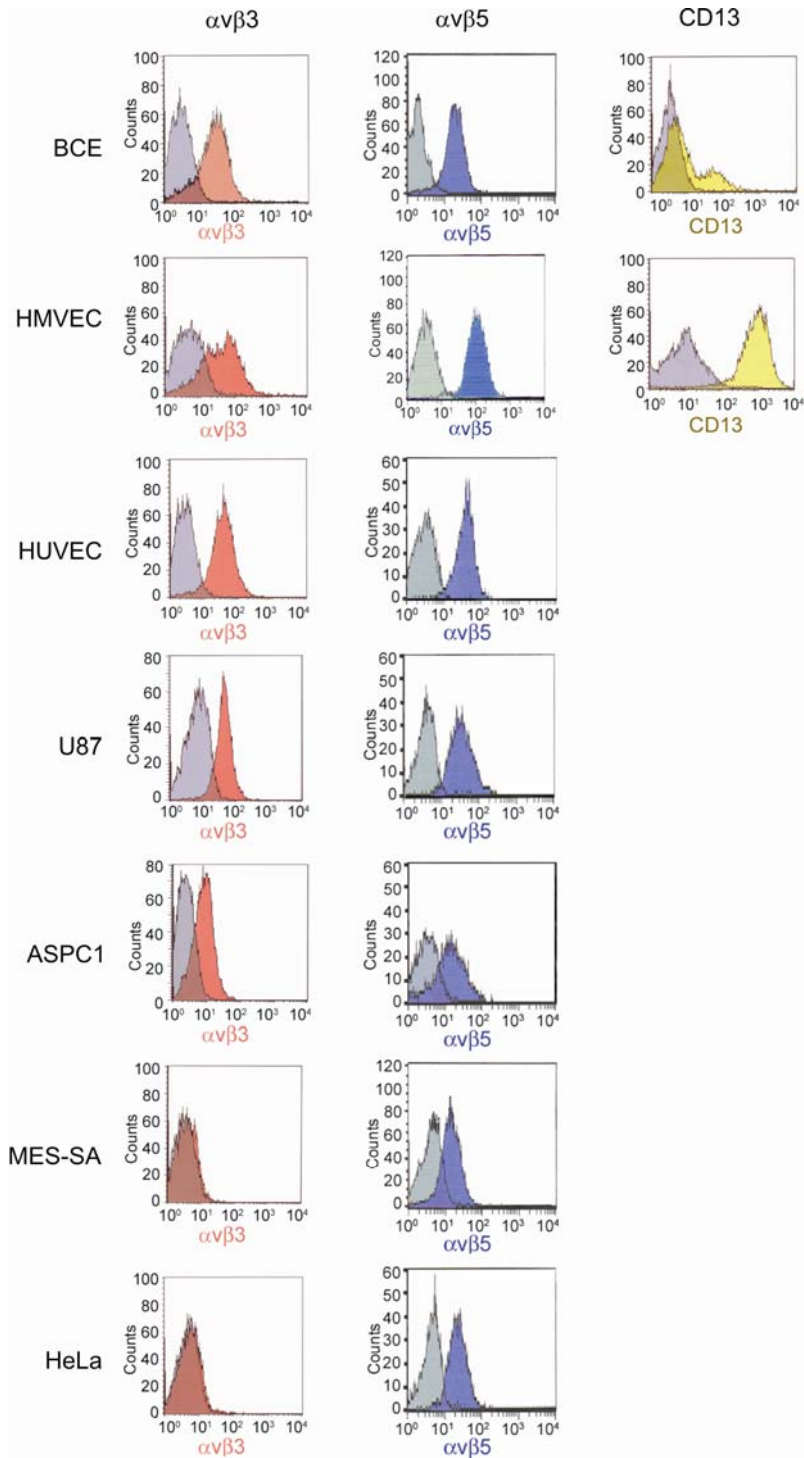

**Figure S3.** Fluorescence-activated cell sorting of primary endothelial cells and tumor cell lines labeled with monoclonal antibodies to integrin  $\alpha_v\beta_3$ , integrin  $\alpha_v\beta_5$ , and aminopeptidase N (CD13).

## A. Monoconjugated Platinum-Peptide Compounds

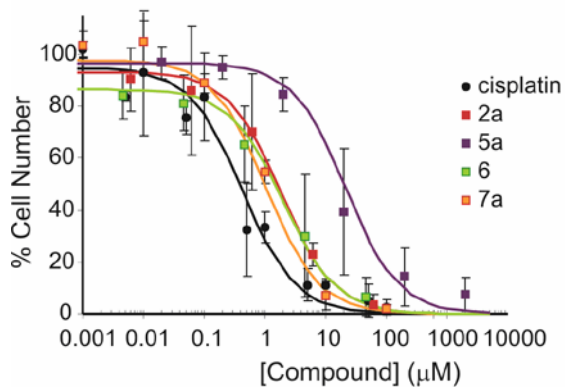

## B. Diconjugated Platinum-Peptide Compounds

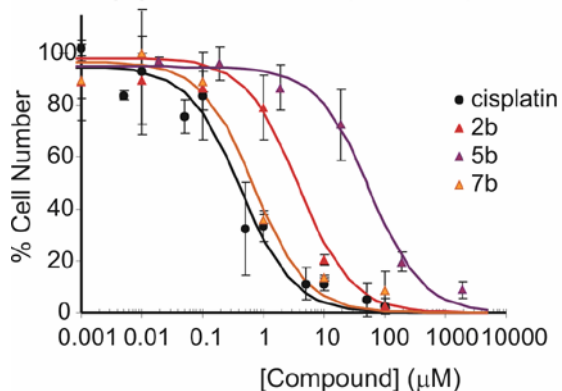

**Figure S4.** Concentration-response assay of platinum compounds on U87 cells. Selected monofunctionalized platinum(IV) complexes along with cisplatin, and **1(A)**. Selected difunctionalized platinum(IV) complexes along with cisplatin, and **1(B)**. Cells were treated for 72 h with each complex and counted with the use of a Coulter counter.
